# Supplementary material
Source: HighWire-hosted journal article supplement (doi:10.1101/rna.079957.124)
Supplement: Supplemental_Tables_and_Figures.pdf [file Supplemental_Tables_and_Figures.pdf]

## Supplementary tables and figures

**Supplementary Table 1: tRNA introns in human fungal pathogens.**

| Species                  | Number of isodecoders | Number of isodecoders with an intron in all genes # |
|--------------------------|-----------------------|-----------------------------------------------------|
| <i>S. cerevisiae</i>     | 41                    | 10                                                  |
| <i>C. albicans</i>       | 41                    | 23                                                  |
| <i>C. auris</i>          | 40                    | 10*                                                 |
| <i>A. fumigatus</i>      | 44                    | 19                                                  |
| <i>H. capsulatum</i>     | 45                    | 27                                                  |
| <i>P. jirovecii</i>      | 45                    | 27                                                  |
| <i>C. neoformans</i>     | 41                    | 39                                                  |
| <i>R. arrhizus</i>       | 41                    | 2                                                   |
| <i>M. circinelloides</i> | 43                    | 2                                                   |

# Some additional isodecoders have an intron in some genes. For example, the *C. albicans* genome contains five genes for Lys tRNA with a UUU anticodon, but only one of those genes has an intron and thus this tRNA is not counted in the table and Figure 1C.

\* In *C. auris*, the elongator Met tRNA genes have an intron (and are included in the count), while the initiator Met tRNA genes do not have an intron.

**Supplementary Table 2: tRNA splicing machinery in pathogenic fungi**

|                          | <i>TRL1</i> orthologs    | tRNA splicing endonuclease |       | 2'-phospho Transferase | Alternative ligases |       |
|--------------------------|--------------------------|----------------------------|-------|------------------------|---------------------|-------|
|                          | Trl1                     | Sen2                       | Sen34 | Tpt1                   | RTCB                | RLIG1 |
| <i>S. cerevisiae</i>     | Y                        | Y                          | Y     | Y                      | N                   | N     |
| <i>C. albicans</i>       | Y                        | Y                          | Y     | Y                      | N                   | N     |
| <i>C. auris</i>          | Y                        | Y                          | Y     | Y                      | N                   | N     |
| <i>A. fumigatus</i>      | Y                        | Y                          | Y     | Y                      | N                   | N     |
| <i>H. capsulatum</i>     | Y                        | Y                          | Y     | Y                      | N                   | N     |
| <i>P. jirovecii</i>      | Y                        | Y                          | Y     | Y                      | N                   | N     |
| <i>C. neoformans</i>     | Y                        | Y                          | Y     | Y                      | N                   | N     |
| <i>R. arrhizus</i>       | Truncated (sealing-only) | Y                          | Y     | Y                      | N                   | N     |
| <i>M. circinelloides</i> | Truncated (sealing-only) | Y                          | Y     | Y                      | N                   | N     |
| <i>R. irregularis</i>    | Y                        | Y                          | Y     | Y                      | N                   | N     |

Y: Orthologs present, N: No ortholog present

**Supplementary Table 3: Plasmids used**

| Plasmid | Plasmid description             | Plasmid construction                                                                                                                                  |
|---------|---------------------------------|-------------------------------------------------------------------------------------------------------------------------------------------------------|
| p425GPD | Empty vector                    | (Mumberg et al. 1995)                                                                                                                                 |
| pRS413  | Empty vector                    | (Sikorski and Hieter 1989)                                                                                                                            |
| pAv1512 | p425GPD-ScTRL1                  | <i>S. cerevisiae</i> <i>TRL1</i> gene amplified from genomic DNA and cloned in pRS425GPD.                                                             |
| pAv1655 | p425GPD-CalbTRL1                | <i>C. albicans</i> <i>TRL1</i> gene amplified from genomic DNA and cloned in pRS425GPD digested with Sall and XhoI.                                   |
| pAv1656 | p425GPD-CaurTRL1                | <i>C. auris</i> <i>TRL1</i> gene amplified from genomic DNA and cloned in pRS425GPD digested with Sall and XhoI.                                      |
| pAv1880 | p425GPD-AfumTRL1                | Codon-optimized <i>A. fumigatus</i> <i>TRL1</i> was amplified and Gibson assembled in pRS425GPD digested with BamHI and XhoI.                         |
| pAv1881 | p425GPD-HcapTRL1                | Codon-optimized <i>H. capsulatum</i> <i>TRL1</i> was amplified and Gibson assembled in pRS425GPD digested with BamHI and XhoI.                        |
| pAv1882 | p425GPD-CneoTRL1                | Codon-optimized <i>C. neoformans</i> <i>TRL1</i> was amplified and Gibson assembled in pRS425GPD digested with BamHI and XhoI.                        |
| pAv1883 | p425GPD-RarrTRL1                | Codon-optimized <i>R. arrhizus</i> <i>TRL1</i> was amplified and Gibson assembled in pRS425GPD digested with BamHI and XhoI.                          |
| pAv1884 | p425GPD-McirTRL1                | Codon-optimized <i>M. circinelloides</i> <i>TRL1</i> was amplified and Gibson assembled in pRS425GPD digested with BamHI and XhoI.                    |
| pAv1885 | p425GPD-RirrTRL1                | Codon-optimized <i>R. irregularis</i> <i>TRL1</i> was amplified and Gibson assembled in pRS425GPD digested with BamHI and XhoI.                       |
| pAv1909 | p425GPD-PjirTRL1                | Codon-optimized <i>P. jirovecii</i> <i>TRL1</i> was amplified and co-transformed into yeast with pRS425GPD digested with BamHI and XhoI.              |
| pAv1630 | pRS413- <i>trl1</i> -K114A      | <i>S. cerevisiae</i> <i>trl1</i> -K114A was amplified with mutation-specific primers and Gibson assembled in pRS413 digested with Sall and SacI.      |
| pAv1616 | pRS413- <i>trl1</i> -K404AT405A | <i>S. cerevisiae</i> <i>trl1</i> -K404AT405A was amplified with mutation-specific primers and Gibson assembled in pRS413 digested with Sall and SacI. |

|         |                                |                                                                                                                                           |
|---------|--------------------------------|-------------------------------------------------------------------------------------------------------------------------------------------|
| pAv1614 | pRS413- <i>trl1-H777A</i>      | <i>S. cerevisiae trl1-H777A</i> was amplified with mutation-specific primers, and Gibson assembled in pRS413 digested with Sall and SacI. |
| pAv1886 | p425GPD-Rarr <i>trl1-K116A</i> | <i>K116A</i> mutation was introduced in <i>R. arrhizus TRL1</i> using QuikChange Site-Directed Mutagenesis Kits (Agilent).                |
| pAv1887 | p425GPD-Mcir <i>trl1-K118A</i> | <i>K118A</i> mutation was introduced in <i>M. circinelloides TRL1</i> using QuikChange Site-Directed Mutagenesis Kits (Agilent).          |

**Supplementary Table 4: Strains used**

| Strain  | Genotype                                                                  |
|---------|---------------------------------------------------------------------------|
| BY4741  | <i>matA, ura3-Δ0, leu2-Δ0, his3-Δ1, lys2-Δ0</i>                           |
| yAv4576 | <i>matA, ura3-Δ0, leu2-Δ0, his3-Δ1, lys2-Δ0, trl1Δ::NEO, [TRL1, URA3]</i> |
| yAv4415 | <i>matA, ura3-Δ0, leu2-Δ0, his3-Δ1, lys2-Δ0, ire1Δ::NEO, hac1Δ::NAT</i>   |
| yAv4154 | <i>matA, ura3-Δ0, leu2-Δ0, his3-Δ1, lys2-Δ0, ire1Δ::NEO</i>               |

**Supplementary Figure 1: The tRNA splicing pathway is related to tRNA repair pathways in *E. coli* and its T4 phage.** Top panel: the pre-tRNA splicing pathway from Figure 1A. Bottom panel: In bacteria and eukaryotes, tRNAs that have been cut by endonucleases are repaired. The *E. coli* pathway carried out by RtcB is very similar to the human pathway (carried out by RTCB). The T4 phage uses a heal and seal pathway, but the sealing activity of its polynucleotide kinase creates a 2' 3' OH instead of the 2'PO4 in yeast. The T4 Rnl1 ligase is active on this end, while yeast Trl1 requires a 2' PO4. Because of this difference in ligase, the T4 pathway doesn't require Tpt1.

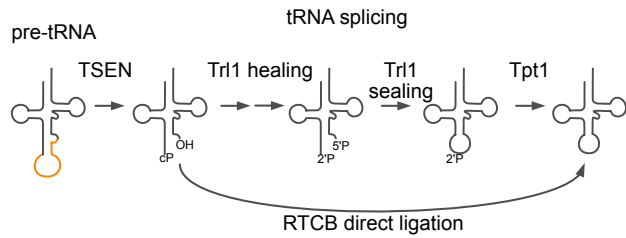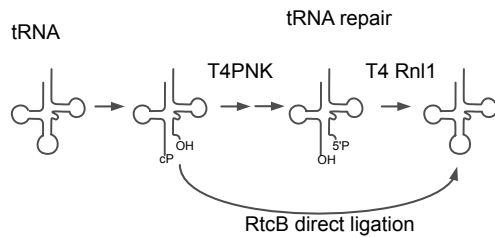

**Supplementary Figure 2: Multiple sequence alignment of Trl1 orthologs.** The following orthologs were aligned using CLUSTAL O(1.2.4): *S. cerevisiae* (Scer; YJL087C), *C. albicans* (Calb; C7\_02060W\_A), *C. auris* (Caur; B9J08\_004868), *A. fumigatus* (Afum; XP\_752336.1), *H. capsulatum* (Hcap; XP\_001544422.1), *P. jirovecii* (Pjir; XP\_018228553.1), *C. neoformans* (Cneo; XP\_012049418.1), *R. arrhizus* (Rarr; KAG0748437.1), *M. circinelloides* (Mcir; EPB83728.1), and *R. irregularis* (Rirr; PKK72613.1). The conserved peptide motifs (motif I, Ia, III, IV, V) in the ligase domain of Trl1 orthologs are indicated with blue boxes.

|      |                                                              |     |      |                                                               |     |
|------|--------------------------------------------------------------|-----|------|---------------------------------------------------------------|-----|
| Scer | -----MP                                                      | 2   | Scer | AEFETWDMKDVSMQASKYGFRCVQCITNTLEDLKKFLDNCSATGSFEGQIEGFVIRCH    | 273 |
| Calb | -----                                                        | 0   | Calb | ITFKTLPMDQVLQFAKEWGFYVSYLTDNAEDLFLFKHKGCESTGYNREIEGFVIRCH     | 283 |
| Caur | -----ML--EPIP                                                | 6   | Caur | IQFHSYPMKNVAVADYFGFKRVYEQYDSFTDLSWFLFEEKSRTGIFQGRIEGFVIRAK    | 276 |
| Afum | -----                                                        | 0   | Afum | PQFATLPSSEVHNFADTWGFKKAKYLVYDDIHSVKFLDHCAETGTWDGRETGFVIRCO    | 277 |
| Hcap | -----MD                                                      | 2   | Hcap | PEFATLPSLEVHNFADTWGFKKAKYLVYDDIHSVKFLDHCAETGTWDGRETGFVIRCO    | 275 |
| Pjir | -----MPPPPP                                                  | 7   | Pjir | PAFSTAPFNVEVCSFGVEWGFQVDYIIFESLLELRNFIEDSEKSGSYHGREGVEGFVIRCK | 276 |
| Cneo | -----MNNINP                                                  | 7   | Cneo | PHFSTSSPSVAFAKFEFGIQTKYIQLESLSQVRSFADLAQSGTWEGEMIEGFVIRCT     | 423 |
| Rarr | -----MVDGIDIP                                                | 7   | Rarr | STLQTLPSAIVQVALAFGHHTSFETSSIEKVKYFADMQRSTGYLNRGIEGFVIRCK      | 275 |
| Mcir | -----                                                        | 6   | Mcir | SELYLTPVSVVEQTAKEFGHATDFTVDTAEQVKFEGHVMQQTGYNREIEGFVIRCK      | 277 |
| Rirr | MDLNLSTLFIIVVFIYRFRKTSISTKNNNDTRNVGDENASDEIKKSTKSDTSQDSIQID  | 60  | Rirr | VDLKTWPKSLVTFNAKEWGFNPVYVQVDEVKSFIVNIEKRVLDREIEGFVIRCK        | 325 |
| Scer | SP----YDGKRTVTLVNELEKAEKLSGRG--RAYRR-----VCDLS-----HSNKK     | 43  | Scer | LKST-----EKPFEEKYKFEPEYLYRQWREVTKDYISNK-SRV---F---            | 312 |
| Calb | -M----KDSQSDIELCNKLNEATLKRNG--KSIKL-----TNFVS-----NTQIK      | 40  | Calb | RQSTNGDTD-----GDCFFPKYKFEQYLLYRQFREVTKQLLNGTPIINS---I---      | 319 |
| Caur | V----FRDSEADLRDFVDLENSLIRKER-----STR---KQYKFPFTT---NGEAV     | 49  | Caur | DKEDD-----DFFPKYKFEPEYLYRQWREVTKDYISNK-SRV---F---             | 312 |
| Afum | -M----VQDDPQEVAVHLVGALEASSKKNRSEGRKTFCK---KSTFAVAG---SDNIS   | 47  | Afum | LGEGG---VGP-----YRDWFFPKYKFEPEYLYRQWREVTKDYISNK-SRV---F---    | 316 |
| Hcap | -M----VQDDGHEVTRLVHLSLEAASGKKKQLGKKTFSCK---KSTFPVSG---SD-IS  | 46  | Hcap | LSGGG---VGP-----YRDWFFPKYKFEPEYLYRQWREVTKDYISNK-SRV---F---    | 316 |
| Pjir | SR----KSEVPEAQELISRIEKAENDQNRNSKSVLKH-----TFTL---KNGTK       | 46  | Pjir | SKNSDE-DTC-----FRDFFPKYKFEPEYLYRQWREVTKDYISNK-SRV---F---      | 318 |
| Cneo | POPSTYASKHPSTPRLLNALRDL---HATDPKAI RTTVHRYPAALYAHGQDDHARDRF  | 63  | Cneo | VKSGDGMQSGAPPYHANSFPFFPKYKFEPEYLYRQWREVTKDYISNK-SRV---F---    | 413 |
| Rarr | AI----DLK--DQVHNIYVEK--YHEIK---ESSKDVRCR-----DFIL---EDEIK    | 45  | Rarr | R--DG-----NDMFPKIK-NEQYLYRQWREVTKDYISNK-SRV---F---            | 315 |
| Mcir | HF----TVD--QARVQHVIEQLYQVKL---DTPKELRSK-----DFVL---EDGQV     | 46  | Mcir | R--NG-----MDMFPKIK-NEQYLYRQWREVTKDYISNK-SRV---F---            | 317 |
| Rirr | PV----TQKDLTEADELISNLYKS-----KGGKVKRN-----EFVHK---SSGVT      | 98  | Rirr | TVSTG-----QDFPKIKYDEPYLYRQWREVTKDYISNK-SRV---F---             | 360 |
| Scer | VIWKFNEDWYKNTITLPCNARGLFISSD-TT-----NPPVIVAR                 | 82  | Scer | ---KFRKHKFITNKYLDFAIPILESSPKICENYKLGFGVIELRNLFLQSYGMS-GLEILN  | 368 |
| Calb | LDSWKFLEWDYKPSVQLPIQARGLFTLNN-----DTIAVR                     | 76  | Calb | ---KIKKKNKPIITKYLQFVEKLFQEPPEIARNFENGFDIIRKVLQFLQSLNENGMNLLS  | 386 |
| Caur | VDSWKFNEFAYGTDI-ELPSQARGLFTRDG-----KIAR                      | 83  | Caur | ---EQRKHARIVQAYLDFVEKLFSEQPELAEQYLEKGIHKVRKMFLLKIDGLDQ--DGMG  | 375 |
| Afum | VDSWRFDWDYK--RSNLPYARGLFTSKRRKDG-----TPEIIVR                 | 85  | Afum | ---NIRKHKQITTEYLHARQRLSQNPKLGDLYQNHGII SMREGFLKERGLKGS-DIIA   | 372 |
| Hcap | VDSWRFDWDYK--RDDLPYARGLFTSKRNEKN-----QVEIAIR                 | 84  | Hcap | ---KIKKHVAITEQYLYARQFADPKLAKLYQNHGII SMRDFGLKERGMKS-DIIA      | 374 |
| Pjir | IDSWKLFPEFGSKTFT-KTLDIRGLFTSKRNEKN-----HHEIVIR               | 85  | Pjir | ---FSTSDIEITKQYAKWRLLKKEPDLKLYQNHGII SMRDFGLKERGMKS-DIIA      | 374 |
| Cneo | ITSWKTEHMYFKKLSVFTLARGLFTTEVLEGDMPPLETCSHQSESNPDAPNERIVLR    | 123 | Cneo | KKVRSRAKREPVKYSYTWGEMMKKEPELEFDYIN--RGVIRVREERFLKWAEDDGKMWDD  | 541 |
| Rarr | WTSWIVRESVYKPKHLPALARGLFTTKKT-NG-----KHSIVVR                 | 84  | Rarr | PTQAKYKYEKTKFYIDWLKKEVKEPEWFKYKAEKGIQTRQEFEEYKWTGS-SAAT       | 374 |
| Mcir | WTSWIMRESVYKPKHLPALARGLFTTKKT-NG-----QYQIMVR                 | 86  | Mcir | PKKMKQEKTRFYIEWLKRVADHPEWFLKAEKGIQTRQEFEEYKWTGS-SAAT          | 372 |
| Rirr | LSSWKMNEDWYK--KHRTPTQARGLFTRET-NS-----KNEIVIR                | 135 | Rirr | ---KPRTTYALSKQYLEWTEKIKTHPKLFEYKGNKGIIFVRDMFLEYLNKGD-IQTF     | 416 |
| Scer | GYDKFNVGVEVNTKWNNEIENCTGYPDVTIKANGCIIIFISGLEDDGLVVCCKHSTGPRA | 142 | Scer | HEKVAELE---LKNADYDKVDERTKFLIFPISVIGCGKTTTQSLVNLNFPDSWGHQND    | 425 |
| Calb | GYDKFNVGVEVNTKWNNEIENCTGYPDVTIKANGCIIIFISGLEDDGLVVCCKHSTGPRA | 136 | Calb | IDSELSDQKLNLANGLNGLSTTKYIFVPIATIGCGKTTTQSLVNLNFPDSWGHQND      | 445 |
| Caur | GYDKFNVGVEVNTKWNNEIENCTGYPDVTIKANGCIIIFISGLEDDGLVVCCKHSTGPRA | 142 | Caur | LVALNNE---KLTKRNFEEVEVKRYLFPFIAPVGGKTTTQSLVNLNFPDSWGHQND      | 432 |
| Afum | GYDKFNVGVEVNTKWNNEIENCTGYPDVTIKANGCIIIFISGLEDDGLVVCCKHSTGPRA | 145 | Afum | MEAGKPV-----DEVTRDVLAPASLGGKTTTQSLVNLNFPDSWGHQND              | 416 |
| Hcap | GYDKFNVGVEVNTKWNNEIENCTGYPDVTIKANGCIIIFISGLEDDGLVVCCKHSTGPRA | 144 | Hcap | MELAQGE-----GTSPLAKVTQDIVLVVVASIGCGKTTTQSLVNLNFPDSWGHQND      | 422 |
| Pjir | GYDKFNVGVEVNTKWNNEIENCTGYPDVTIKANGCIIIFISGLEDDGLVVCCKHSTGPRA | 144 | Pjir | LLNMM-----TDDLEDRSILVVTIGTIGCGKTTTQSLVNLNFPDSWGHQND           | 420 |
| Cneo | GYDKFNVGVEVNTKWNNEIENCTGYPDVTIKANGCIIIFISGLEDDGLVVCCKHSTGPRA | 145 | Cneo | ARAGVKD-----EQRTGNRDLPKKMIWVPAAPGCGKTTTQSLVNLNFPDSWGHQND      | 594 |
| Rarr | GYDKFNVGVEVNTKWNNEIENCTGYPDVTIKANGCIIIFISGLEDDGLVVCCKHSTGPRA | 146 | Rarr | EK-----                                                       | 376 |
| Mcir | GYDKFNVGVEVNTKWNNEIENCTGYPDVTIKANGCIIIFISGLEDDGLVVCCKHSTGPRA | 145 | Mcir | AK-----                                                       | 372 |
| Rirr | GYDKFNVGVEVNTKWNNEIENCTGYPDVTIKANGCIIIFISGLEDDGLVVCCKHSTGPRA | 146 | Rirr | AK-----IPQEEIKTLVPGTIGCGKTTTQSLVNLNFPDSWGHQND                 | 457 |
| Scer | DV-----DRNHAEAGE                                             | 144 | Scer | DITGKDKSMLKKSLELLSKKEIKCVIVDRNNHQFRERKQFLFELWNLKEDYLVYDNIK    | 485 |
| Calb | DDNESDKTTT-----                                              | 146 | Calb | NISKAKLKICDLTLLALEDDQSVLFDNRNSASRERQIFPTIDQKRDEHLDVTDLK       | 505 |
| Caur | IESDG-----                                                   | 147 | Caur | NYSAPK-----EFRNSCVKSLADSPLLLDRNNSRKRERQSLDIDFQMRNCVLPVNVGLR   | 488 |
| Afum | DTNL-----                                                    | 149 | Afum | NIPKQKPKRFAFEIANLLADKPVVIADRNHHQRERQSLMEDI LPGAIP-----GAK     | 469 |
| Hcap | DVTL-----                                                    | 148 | Hcap | NIQAPKPKRFAFEIANLLADKPVVIADRNHHQRERQSLMEDI LPGAIP-----GAK     | 473 |
| Pjir | CGIS-----                                                    | 149 | Pjir | NITGKTKIQKFTVSTIEALMHYVVIADRNHHQRERQSLMEDI LPGAIP-----GAK     | 473 |
| Cneo | AAEGVDSGTEKLIKDKPKAPKQCNESAPEKISQIRPIPSFPPTVKLPDEFKNNLTLEQS  | 243 | Cneo | DITTKRTAPT-FIKNVITLTVHVVADRNHHQRERQSLMEDI LPGAIP-----GAK      | 473 |
| Rarr | TDIK-----                                                    | 148 | Rarr | -----EDKKLQKFDTR                                              | 649 |
| Mcir | TDVK-----                                                    | 150 | Rarr | -----                                                         | 376 |
| Rirr | -NAL-----                                                    | 198 | Mcir | -----                                                         | 372 |
| Scer | -----DRNHAEAGE                                               | 153 | Rirr | NIIGKKARIE-FYRSINESSSHSGVLADRNHHI IELRKTLEIAVAKSNLS-----NVR   | 509 |
| Calb | -----ATATATATRNHAKQGE                                        | 163 | Scer | VIGVSAFAPYDKL-----SEIRIDTLQRVIRKGNHNSQIKWDELGEKKVVGIMNGF      | 535 |
| Caur | -----KGRSRYERAK                                              | 157 | Calb | YIAINFPEPDL-----EELWDTYVNRVGRDNHNSQIKWDELGEKKVVGIMNGF         | 555 |
| Afum | -----SHAQGE                                                  | 156 | Caur | RVGINFTACDD-----KEKFSKVIKREIARGDNHNSQIKWDELGEKKVVGIMNGF       | 537 |
| Hcap | -----SHAQGE                                                  | 155 | Afum | FVALHYVHEPKDVL-----LPSIREVTRKRLERGDNHNSQIKWDELGEKKVVGIMNGF    | 522 |
| Pjir | -----SHAQGE                                                  | 156 | Hcap | FVALHYVHEPKDVL-----LHDIKVQVQARVLRGDNHNSQIKWDELGEKKVVGIMNGF    | 528 |
| Cneo | QASQSLKSNALKAEKAAKLYQKMMNKGSEKSSQSTTAEKKEIKEHEEAQHAVVGR      | 303 | Pjir | FIALYHYHDKDASLCKKQELNKILKITQDRVFARGSNHQITIDASPNIKAVLGMNGF     | 533 |
| Rarr | -----AHAGVGY                                                 | 155 | Cneo | LICVWDLDTFF-----YRLLRILSDRVVARGENHQITLRLDPLDAEHAUVGKF         | 700 |
| Mcir | -----AHAGVGY                                                 | 157 | Rarr | -----                                                         | 376 |
| Rirr | -----AHAVVGE                                                 | 205 | Mcir | -----                                                         | 372 |
| Scer | QQLLRQAAMNINRSDFARMYLTHTVAVAEYDDEFEHILEYPLEKAGLYLHGIVNKK     | 213 | Rirr | IVAIYWNHEDRT-----KNEIFKITSKRVVSRGENHNSQIKWDELGEKKVVGIMNGF     | 557 |
| Calb | FELLQDFDQDQKQVQLAHYLYENNTLVVAELDDDEFEHIVLPPKDKSGLYVHGLNYNT   | 223 | Scer | LKRYQPV-----NLDSKPNDFMLMELDFGQA-----DSSLTNAKQILNEI            | 577 |
| Caur | KTVYHLEKAGKLAEEALFTLYKHNITVAELDDDEFEHILEYPLEKAGLYLHGIVNKK    | 217 | Calb | IQRYPPI-----NTRSPDQDFDHIYHLKLSKDNSSKSLNENVI I IDDL            | 601 |
| Afum | KWVERHVAAGVGRMADLAKALRKNLTAVALGELDDDEFEHIVLPPKDKSGLYVHGLNYNT | 216 | Caur | EARLQPTLVASAPKNKVKGDELESPDSSFYSIMNFIDIT-----KSSLEIAKEIWAY     | 591 |
| Hcap | NWAKRHVAAGVGRMADLAKALRKNLTAVALGELDDDEFEHIVLPPKDKSGLYVHGLNYNT | 215 | Afum | LKRFEGV-----NREPEPDSGFDDHIVLDLVA-----ASSRENLETVNVAL           | 562 |
| Pjir | TWLDRLHLSVGRTRKQLARVLRKKNLTVLSELDDDEFEHILEYPLEKAGLYLHGIVNKK  | 216 | Hcap | LSRFEAI-----DNLNYPDGGDFDHIYHLKLSKDNSSKSLNENVI I IDDL          | 568 |
| Cneo | RWLKRTLESSGKTEELARLWKNLTAVALGELDDDEFEHIVLPPKDKSGLYVHGLNYNT   | 363 | Pjir | LSRFEAI-----DRSKEPDSLFENVI ILDP-----KDRYLNLEIVVRLK            | 573 |
| Rarr | NWVTKHLASVDKKEDEALWLFKFGVITVAELDDDEFEHILEYPLEKAGLYLHGIVNKK   | 215 | Mcir | IRDYTPP-----D-----PAIFSDIISVNMV-----DSAKVTLTKVVQGL            | 735 |
| Mcir | NWVTKHLASVDKKEDEALWLFKFGVITVAELDDDEFEHILEYPLEKAGLYLHGIVNKK   | 217 | Rarr | -----                                                         | 376 |
| Rirr | QWLKHLKVVGRTEELANFLYKRNSTAVAEYDDEFEHIVLPPKDKSGLYVHGLNYNT     | 265 |      |                                                               |     |

Mcir ----- 372  
 Rirr LNDFQPL-----NSNNKIDNQFDHVIEDVA-----NDVKTNLETVINEL 597  
  
 Scer HKAYPILVP-EIPKDEIETAFRRS-LDYKPTVRKIVGKGNNOQK----- 621  
 Calb VQNFPLIK-EKPADELINCFQKA-LDYKPTFKVNMNTANTIK-K----- 643  
 Caur LSQLOQFNDERDPTTEEWQRAYQEA-LDYKPTFKKVVSSK----- 630  
 Afum HSFPDQLLR-RVPTSQELDDAVTWAMTEYHVQLDLSYSGSSKPRQNLNKNKQNDGAST 621  
 Hcap HSSFPQMEGKMPSSDLDNAIDDMKNKYVDTKHDLKFSNSN----- 611  
 Pjir HEIIPKYIT-EIPTAFQMDNAVSSALNDYRPCISSVFPC----- 611  
 Cneo VKSLGL---TMPSEDAINQGLEAA-SLYKTTTFVHPAA----- 769  
 Rarr ----- 376  
 Mcir ----- 372  
 Rirr KPILGF---EKPSDEKIEK-VLEEISDYKPTVRKI---VG----- 630  
  
 Scer -----TPKLIKPTYISAKIENY--DEIIEI--VKRCIASDAELTEKFKHLLA 664  
 Calb -----DPTYYGIAM-HY--SSILEN--LEI--VSH--NEHFQ--NI 673  
 Caur -----NLGDKRPEYGVRIEDV--SGLID-----GVSTKLGEQKMWQSMRA 669  
 Afum AAHAQPQEPFSPPEALAQKIEYFCISIPAEVTTLLHS--LFPSP--TPPEKARLYHHLVN 678  
 Hcap -KFSKQAPRESPDQLAKRIEYFNI SLNSNQITLLAS--LFSSTIPPERKLYHHLKN 668  
 Pjir -----FSQTPYFAIVLKDNL-ALYVEE--IM--QGQSEKRTFWHELKS 651  
 Cneo -----RHGKSTRYFAVAPEINLYELTSKAIEPFRDTEKQSAWSFLDELYK 815  
 Rarr ----- 376  
 Mcir ----- 372  
 Rirr -----NKPPKVSFYGIKDFN-VQEF LSD--YY--NKHPNEDSGIFKLVQ 671  
  
 Scer SGKVQKELHITLGHVMSREKE--A-----KWLKSYCNRY 698  
 Calb KSHIQTEFHVTLGHIASSKQDK--AG-----RVKWKLVKTL 708  
 Caur NDRVQRELHVTIGHKNSIYAF--SL-----KDKWELARRF 704  
 Afum SRRVQPTFHVTLIHRASKTERV-----DIWDRYANQY 710  
 Hcap SRRQTSFHVTLIHRASKTHP-----DIWAYYTNLY 700  
 Pjir LSRVQHTFHVTLIHRADSKYK-----EIWYSYLSRI 683  
 Cneo RGRITARPHVTLSHENNVKVEEARSRTGAPENKDDSELVRSRPGPEEILWETCKSIA 875  
 Rarr ----- 376  
 Mcir ----- 372  
 Rirr GERIGFEHHVTLIHSKELKIDPLYK-----KWLWEQYEKI- 707

Scer TDQITEYNNNRIENAQSGSNNQNTQVKTTDKLNFRLR-KLCWDEKIIAIVVELSKDKDGC 757  
 Calb G-----KGDPNKPK---SALKF-----FADVKLLQIV--INTDKLAC 740  
 Caur AMQVAKKESKE---DKF-----VPVKFCD--VHVKKLVVFDNKLVTLSVQIPQTYKKE 753  
 Afum IAKMKEQSQQAHTASP-----VLTPTLAPARVRLR-RLIWDDRIMAFVARIMPDRRE 763  
 Hcap KAAIQKEQPN-PANGYV-----LETPI LGTTRVRIE-RLVWDDRIMAFVARICPR---E 749  
 Pjir DK-----HGVICQANVEFT--HLVWNSRIMALAAKIDAQ--- 716  
 Cneo -----TSKYPPLYSFLT--HLVWDDRTMAFICISLSPVISS 910  
 Rarr ----- 376  
 Mcir ----- 372  
 Rirr -----CKDLPQVKVHIN-KIVFDSQIMALVVDRIVPSE-- 739  
  
 Scer I IDEN-----NEKIKGLCCQNKIPHITLCKL-----ESGVKAVYSNVLCEKV 799  
 Calb IKVEILK---IYDTNDVLQSEIEPINKQLHITIGCIPPATAVESNITLLELYDNPDEQEL 797  
 Caur GEN-----IILQNPALPEPLNEHLHITVGTVS-----SSVSNADSNVLLHEL 794  
 Afum QPD-----WPCANPIPHVTVGTAS-----AEVKPKESNDLLRRW 797  
 Hcap GDS-----WPCANDIPHITVGTAA-----PEVKPKESNDLLRRW 783  
 Pjir KKK-----LISVNLYPHATIGTEN-----KMI FAKESNDLLAFW 750  
 Cneo TPDEPDGAASLSVCPDLDVLPQATRITLHVTVGTRD-----ADVPAPESRSLVKV 962  
 Rarr ----- 376  
 Mcir ----- 372  
 Rirr -----ICSTNKIMHVITIGTVD-----NNVKHFQANTVCESA 770  
  
 Scer ES---AEVDENIKVVKLDNS--KEFVGSVYLN----- 827  
 Calb KPDGTYKCGDDTLHVFNDPDLKLSQQLFVAYQ----- 832  
 Caur SKKYGD--V-----LA--DGEYPLKATIARVYSFDRLEKQVFIFFSYTF 836  
 Afum LEVGSQ--GDTGIWEAEI--PGVKVVQSGVGMVMSRGKLLK----- 834  
 Hcap LEVGAG--AETGIWEAEV--PSVTMLEGSGVGMVMSRGLMK----- 815  
 Pjir KSHPHD--SSI--MALVL--TPRLFSGIAVAVYPTKSTI----- 783  
 Cneo RERLEAGEQEIEELVANGGSKWIK--VGPARGRIRGMA----- 1003  
 Rarr ----- 376  
 Mcir ----- 372  
 Rirr LSKENQ--S--EICVTNL--ENELVVDGTVKAFY----- 798

### **Supplemental references**

- Mumberg D, Muller R, Funk M. 1995. Yeast vectors for the controlled expression of heterologous proteins in different genetic backgrounds. *Gene* **156**: 119-122.
- Sikorski RS, Hieter P. 1989. A system of shuttle vectors and yeast host strains designed for efficient manipulation of DNA in *Saccharomyces cerevisiae*. *Genetics* **122**: 19-27.
